# Supplementary material for: Multiomics profile and prognostic gene signature of m6A regulators in uterine corpus endometrial carcinoma
Source: PubMed Central journal article supplement (PMC7532517; doi:10.7150/jca.46386), 2020-09-09

A

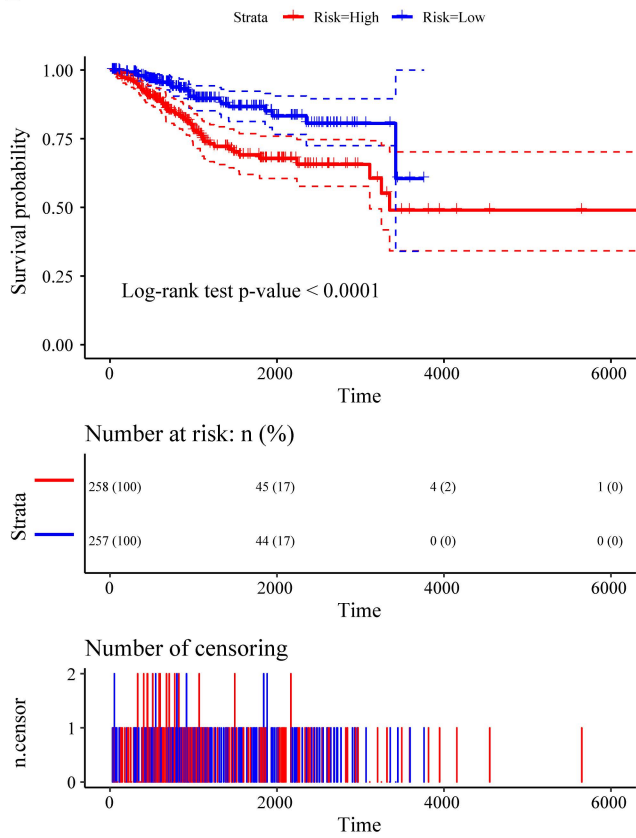

B

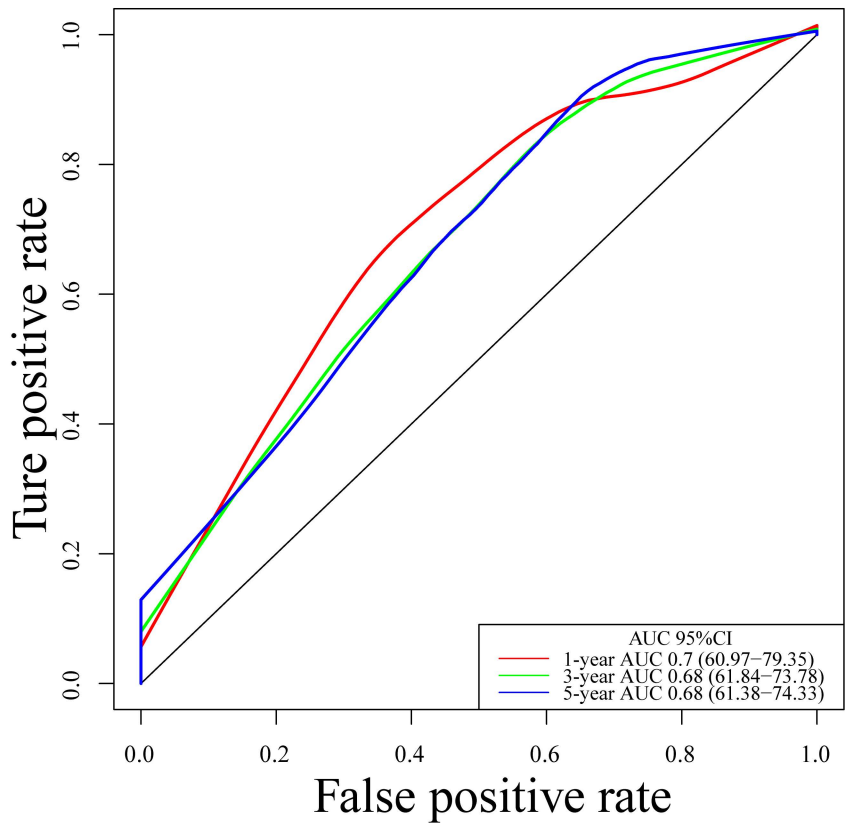

**A**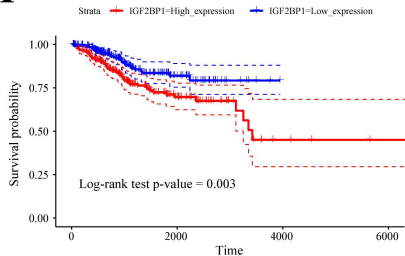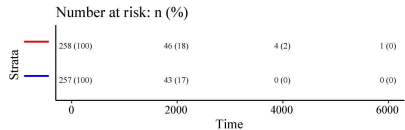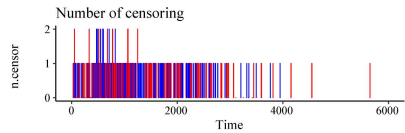**B**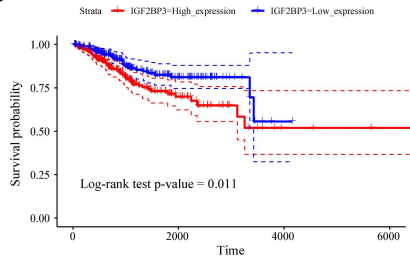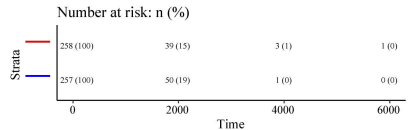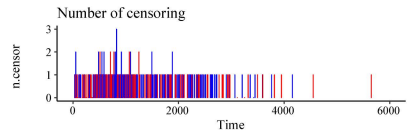**C**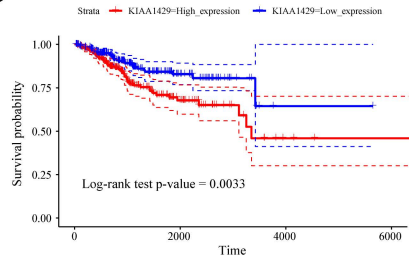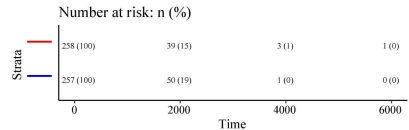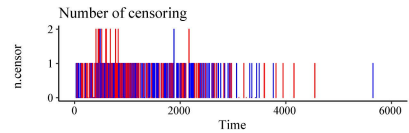

Supplement: jcav11p6390s1.pdf [file jcav11p6390s1.pdf]
